# Supplementary material
Source: Springer Nature journal article supplement (https://www.springermedizin.de/resource/supplementary/12943_2010_833_MOESM12_ESM.pdf/9554940)

**A.  $1 \times 10^5$** 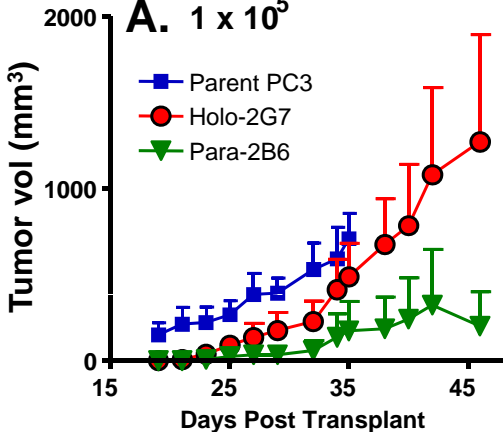**B.  $1 \times 10^4$** 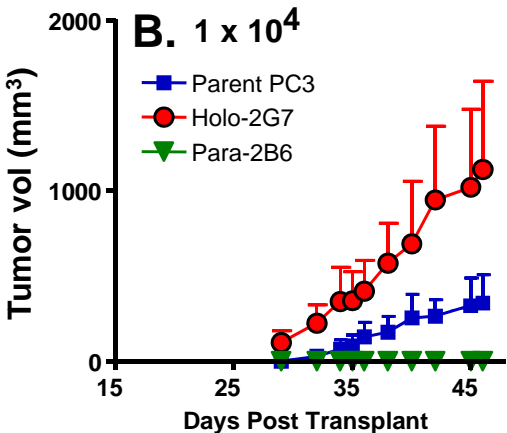

Supplement: MOESM12 [file 9554940]
